# Supplementary material for: Evaluating the Death and Recovery of Lateral Line Hair Cells Following Repeated Neomycin Treatments
Source: Preprints.org preprint supplement (doi:10.20944/preprints202110.0039.v1), 2021-10-04
Supplement: Supplementary file 1 [file supplementary]

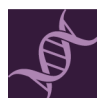

Venuto and Erickson, Supplementary Materials: *Figure S1, Tables S1–S4.*

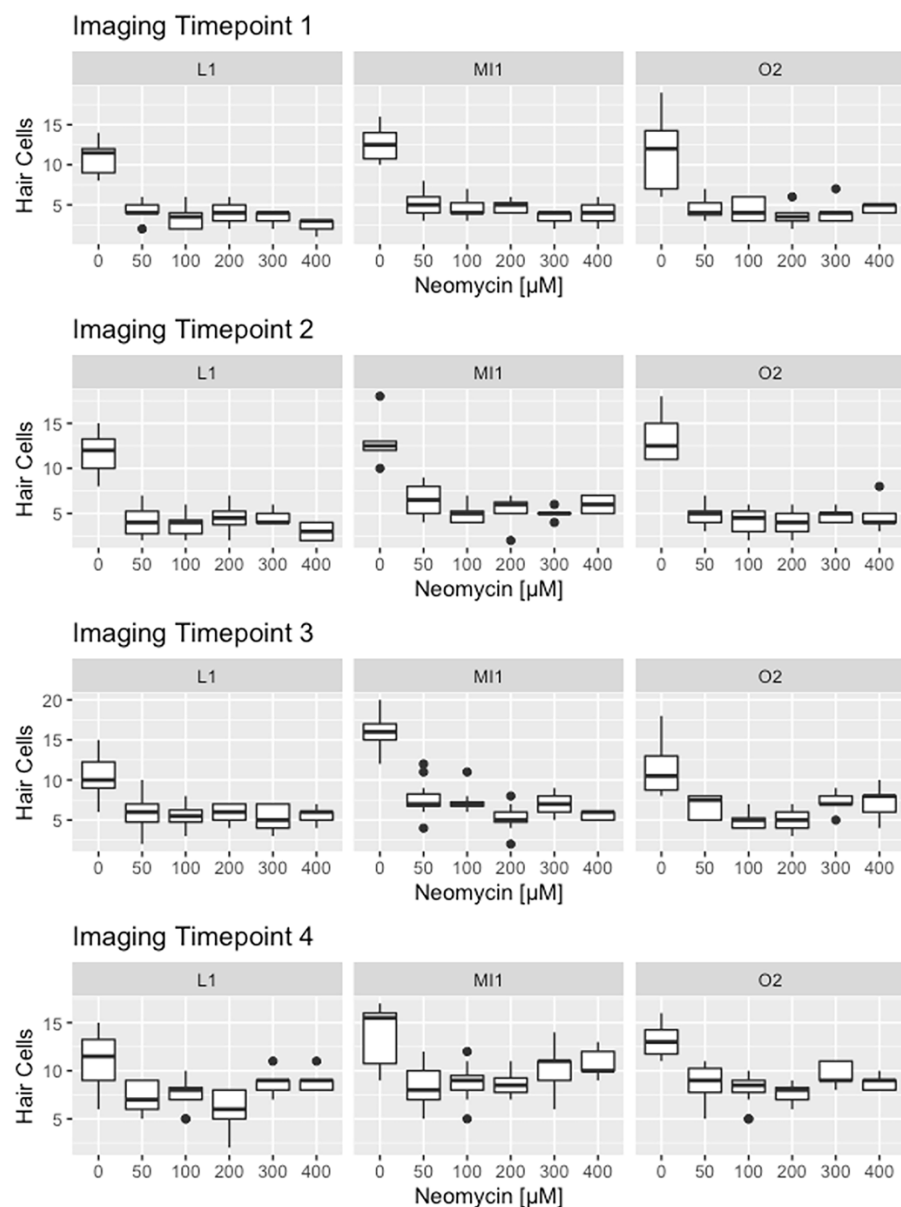

**Figure S1.** Box plot of total hair cell counts (GFP-positive) from individual neuromasts L1, MI1, and O2 at each imaging timepoint in the 12-hour treatment timeline.

**Table S1.** Average final percent larval survival ( $\pm$  standard deviation) at each neomycin concentration. The starting number of larvae are provided for each condition.

| Neomycin Concentration | 6 Hours         |          | 12 Hours        |          |
|------------------------|-----------------|----------|-----------------|----------|
| 0 $\mu$ M              | 96% $\pm$ 6.9%  | (n = 46) | 94% $\pm$ 11.0% | (n = 49) |
| 50 $\mu$ M             | 62% $\pm$ 45.2% | (n = 52) | 86% $\pm$ 18.7% | (n = 49) |
| 100 $\mu$ M            | 24% $\pm$ 33.3% | (n = 58) | 67% $\pm$ 34.4% | (n = 53) |
| 200 $\mu$ M            | 13% $\pm$ 13.7% | (n = 64) | 43% $\pm$ 41.8% | (n = 56) |
| 300 $\mu$ M            | 0% $\pm$ 0.0%   | (n = 68) | 42% $\pm$ 20.2% | (n = 62) |
| 400 $\mu$ M            | 0% $\pm$ 0.0%   | (n = 68) | 18% $\pm$ 6.7%  | (n = 62) |

**Table S2.** Average number of hair cells ( $\pm$  standard deviation) at imaging timepoints I1 – I4 (See Figure 1A) for neomycin concentrations 0, 50, 100, and 200  $\mu$ M.

|                     | Total Hair Cells (GFP+) | Functional Hair Cells (FM+) | Total Hair Cells (GFP+) | Functional Hair Cells (FM+) |
|---------------------|-------------------------|-----------------------------|-------------------------|-----------------------------|
| <b>Timepoint I1</b> | <b>6 Hours</b>          | <b>6 Hours</b>              | <b>12 Hours</b>         | <b>12 Hours</b>             |
| 0 $\mu$ M           | 12.7 $\pm$ 2.7          | 10.7 $\pm$ 2.8              | 10.6 $\pm$ 2.9          | 9.0 $\pm$ 2.8               |
| 50 $\mu$ M          | 4.3 $\pm$ 1.3           | 0.4 $\pm$ 0.4               | 5.0 $\pm$ 1.3           | 1.5 $\pm$ 1.0               |
| 100 $\mu$ M         | 4.1 $\pm$ 1.3           | 0.4 $\pm$ 0.4               | 4.3 $\pm$ 1.4           | 1.5 $\pm$ 1.1               |
| 200 $\mu$ M         | 3.8 $\pm$ 1.3           | 0.4 $\pm$ 0.4               | 4.3 $\pm$ 1.1           | 0.3 $\pm$ 0.3               |
| <b>Timepoint I2</b> |                         |                             |                         |                             |
| 0 $\mu$ M           | 12.4 $\pm$ 2.7          | 11.1 $\pm$ 2.7              | 11.4 $\pm$ 1.5          | 10.2 $\pm$ 1.9              |
| 50 $\mu$ M          | 4.7 $\pm$ 1.5           | 1.2 $\pm$ 1.2               | 5.6 $\pm$ 1.9           | 2.5 $\pm$ 1.3               |
| 100 $\mu$ M         | 4.3 $\pm$ 1.5           | 0.8 $\pm$ 0.8               | 4.6 $\pm$ 1.2           | 2.0 $\pm$ 1.3               |
| 200 $\mu$ M         | 4.3 $\pm$ 1.6           | 1.0 $\pm$ 1.0               | 5.1 $\pm$ 1.3           | 2.1 $\pm$ 1.2               |
| <b>Timepoint I3</b> |                         |                             |                         |                             |
| 0 $\mu$ M           | 12.9 $\pm$ 3.1          | 11.7 $\pm$ 3.5              | 12.2 $\pm$ 3.7          | 10.2 $\pm$ 3.3              |
| 50 $\mu$ M          | 6.8 $\pm$ 2.5           | 1.5 $\pm$ 1.2               | 6.7 $\pm$ 1.3           | 1.7 $\pm$ 1.2               |
| 100 $\mu$ M         | 5.9 $\pm$ 1.9           | 0.8 $\pm$ 0.6               | 5.9 $\pm$ 1.4           | 0.8 $\pm$ 0.7               |
| 200 $\mu$ M         | 5.6 $\pm$ 1.5           | 0.7 $\pm$ 0.7               | 5.2 $\pm$ 1.1           | 0.2 $\pm$ 0.2               |
| <b>Timepoint I4</b> |                         |                             |                         |                             |
| 0 $\mu$ M           | 13.6 $\pm$ 2.9          | 11.6 $\pm$ 3.4              | 13 $\pm$ 2.6            | 12.1 $\pm$ 2.8              |
| 50 $\mu$ M          | 8.1 $\pm$ 2.0           | 3.7 $\pm$ 1.5               | 8.3 $\pm$ 1.9           | 5.6 $\pm$ 2.1               |
| 100 $\mu$ M         | 8.0 $\pm$ 1.8           | 2.3 $\pm$ 1.5               | 8.4 $\pm$ 1.7           | 4.1 $\pm$ 2.1               |
| 200 $\mu$ M         | 7.2 $\pm$ 2.1           | 1.6 $\pm$ 1.1               | 7.7 $\pm$ 1.7           | 2.8 $\pm$ 2.2               |

**Table S3.** Related to Figures 4A, B – Results of a Kruskal-Wallis ANOVA with Dunn post-test comparing hair cell death between the 50, 100, and 200  $\mu\text{M}$  neomycin concentrations at imaging timepoints I1 and I3 in the 6-hour and 12-hour treatment timelines.

| Total Hair Cells (GFP+) at I1 |                   |          |         | Total Hair Cells (GFP+) at I3 |                   |          |         |
|-------------------------------|-------------------|----------|---------|-------------------------------|-------------------|----------|---------|
| Conc. 1                       | Conc. 2           | Interval | P-value | Conc. 1                       | Conc. 2           | Interval | P-value |
| 50 $\mu\text{M}$              | 100 $\mu\text{M}$ | 6 Hours  | 1       | 50 $\mu\text{M}$              | 100 $\mu\text{M}$ | 6 Hours  | 1       |
| 50 $\mu\text{M}$              | 200 $\mu\text{M}$ | 6 Hours  | 1       | 50 $\mu\text{M}$              | 200 $\mu\text{M}$ | 6 Hours  | 1       |
| 100 $\mu\text{M}$             | 200 $\mu\text{M}$ | 6 Hours  | 1       | 100 $\mu\text{M}$             | 200 $\mu\text{M}$ | 6 Hours  | 1       |
| 50 $\mu\text{M}$              | 100 $\mu\text{M}$ | 12 Hours | 1       | 50 $\mu\text{M}$              | 100 $\mu\text{M}$ | 12 Hours | 1       |
| 50 $\mu\text{M}$              | 200 $\mu\text{M}$ | 12 Hours | 1       | 50 $\mu\text{M}$              | 200 $\mu\text{M}$ | 12 Hours | 0.107   |
| 100 $\mu\text{M}$             | 200 $\mu\text{M}$ | 12 Hours | 1       | 100 $\mu\text{M}$             | 200 $\mu\text{M}$ | 12 Hours | 1       |

  

| Functional Hair Cells (FM+) at I1 |                   |          |         | Functional Hair Cells (FM+) at I3 |                   |          |         |
|-----------------------------------|-------------------|----------|---------|-----------------------------------|-------------------|----------|---------|
| Conc. 1                           | Conc. 2           | Interval | P-value | Conc. 1                           | Conc. 2           | Interval | P-value |
| 50 $\mu\text{M}$                  | 100 $\mu\text{M}$ | 6 Hours  | 1       | 50 $\mu\text{M}$                  | 100 $\mu\text{M}$ | 6 Hours  | 1       |
| 50 $\mu\text{M}$                  | 200 $\mu\text{M}$ | 6 Hours  | 1       | 50 $\mu\text{M}$                  | 200 $\mu\text{M}$ | 6 Hours  | 0.462   |
| 100 $\mu\text{M}$                 | 200 $\mu\text{M}$ | 6 Hours  | 1       | 100 $\mu\text{M}$                 | 200 $\mu\text{M}$ | 6 Hours  | 1       |
| 50 $\mu\text{M}$                  | 100 $\mu\text{M}$ | 12 Hours | 1       | 50 $\mu\text{M}$                  | 100 $\mu\text{M}$ | 12 Hours | 1       |
| 50 $\mu\text{M}$                  | 200 $\mu\text{M}$ | 12 Hours | 0.042   | 50 $\mu\text{M}$                  | 200 $\mu\text{M}$ | 12 Hours | 0.197   |
| 100 $\mu\text{M}$                 | 200 $\mu\text{M}$ | 12 Hours | 0.077   | 100 $\mu\text{M}$                 | 200 $\mu\text{M}$ | 12 Hours | 1       |

**Table S4.** Related to Figure 4C – Results of a Kruskal-Wallis ANOVA with Dunn post-test comparing the 6-hour treatment timeline to the 12-hour treatment timeline at imaging timepoint 3 for both the total (GFP+) and functional (FM+) hair cells at the 50, 100, and 200  $\mu\text{M}$  neomycin concentrations.

| Neomycin Concentration | Hair Cell Status | P-value |
|------------------------|------------------|---------|
| 50 $\mu\text{M}$       | GFP +            | 0.898   |
| 100 $\mu\text{M}$      | GFP +            | 0.884   |
| 200 $\mu\text{M}$      | GFP +            | 0.321   |
| 50 $\mu\text{M}$       | FM+              | 0.719   |
| 100 $\mu\text{M}$      | FM+              | 0.485   |
| 200 $\mu\text{M}$      | FM+              | 0.778   |
